# Supplementary material for: Quantifying Hemodynamic Cardiac Stress and Cardiomyocyte Injury in Normotensive and Hypertensive Acute Heart Failure
Source: MDPI journal article supplement (doi:10.3390/biomedicines12051099), 2024-05-16
Supplement: s1 [file s1]

## Supplementary Material

### Quantifying Hemodynamic Cardiac Stress and Cardiomyocyte Injury in Normotensive and Hypertensive Acute Heart Failure

**Table 1S A** Predictive values for BNP plasma concentrations above the median (n=848)

|                               | <b>Odds ratio</b> | <b>95% CI</b> | <b>p-value</b> |
|-------------------------------|-------------------|---------------|----------------|
| Normotensive AHF              | 0.976             | 0.718-1.328   | 0.878          |
| Age                           | 1.016             | 1.001-1.031   | 0.031          |
| Female Sex                    | 1.351             | 0.979-1.864   | 0.068          |
| History of heart failure      | 1.160             | 0.850-1.582   | 0.349          |
| History of hypertension       | 0.812             | 0.547-1.206   | 0.303          |
| Creatinine, $\mu\text{mol/L}$ | 1.006             | 1.004-1.009   | <0.001         |
| LVEF, %                       | 0.948             | 0.937-0.959   | <0.001         |

AHF = acute heart failure; BNP= B-type natriuretic peptide; CI = confidence interval; LVEF= left ventricular ejection fraction on echocardiography; SBP= Systolic blood pressure

**Table 1S B** Predictive values for NT-proBNP plasma concentrations above the median (n=817)

|                               | <b>Odds ratio</b> | <b>95% CI</b> | <b>p-value</b> |
|-------------------------------|-------------------|---------------|----------------|
| Normotensive AHF              | 1.261             | 0.910-1.747   | 0.164          |
| Age                           | 1.041             | 1.024-1.058   | <0.001         |
| Female Sex                    | 1.559             | 1.102-2.206   | 0.012          |
| History of heart failure      | 1.139             | 0.819-1.585   | 0.439          |
| History of hypertension       | 0.907             | 0.596-1.381   | 0.650          |
| Creatinine, $\mu\text{mol/L}$ | 1.014             | 1.011-1.018   | <0.001         |
| LVEF, %                       | 0.952             | 0.941-0.964   | <0.001         |

AHF = acute heart failure; CI = confidence interval; LVEF= left ventricular ejection fraction on echocardiography; SBP= Systolic blood pressure

**Table 2S A** Predictive values for elevated ( $\geq 14$  ng/L) hs-cTnT plasma concentrations (n=849)

|                               | <b>Odds ratio</b> | <b>95% CI</b> | <b><i>p-value</i></b> |
|-------------------------------|-------------------|---------------|-----------------------|
| Normotensive AHF              | 1.021             | 0.594-1.754   | 0.941                 |
| Age                           | 1.038             | 1.014-1.064   | 0.002                 |
| Female Sex                    | 0.555             | 0.309-0.997   | 0.049                 |
| History of heart failure      | 0.927             | 0.525-1.638   | 0.795                 |
| History of hypertension       | 2.938             | 1.653-5.222   | <0.001                |
| Creatinine, $\mu\text{mol/L}$ | 1.030             | 1.018-1.042   | <0.001                |
| LVEF, %                       | 0.969             | 0.951-0.988   | 0.001                 |

AHF = acute heart failure; hs-cTnT = high-sensitivity cardiac Troponin T; CI = confidence interval; LVEF = left ventricular ejection fraction; SBP = systolic blood pressure

**Table 2S B** Predictive values for hs-cTnT plasma concentrations above the median (n=849)

|                               | <b>Odds ratio</b> | <b>95% CI</b> | <b><i>p-value</i></b> |
|-------------------------------|-------------------|---------------|-----------------------|
| Normotensive AHF              | 1.169             | 0.866-1.578   | 0.309                 |
| Age                           | 1.033             | 1.018-1.048   | <0.001                |
| Female Sex                    | 0.625             | 0.457-0.853   | 0.003                 |
| History of heart failure      | 0.857             | 0.632-1.164   | 0.324                 |
| History of hypertension       | 1.118             | 0.763-1.637   | 0.568                 |
| Creatinine, $\mu\text{mol/L}$ | 1.008             | 1.006-1.011   | <0.001                |
| LVEF, %                       | 0.977             | 0.967-0.988   | <0.001                |

AHF = acute heart failure; hs-cTnT = high-sensitivity cardiac Troponin T; CI = confidence interval; LVEF = left ventricular ejection fraction; SBP = systolic blood pressure

**Table 3S A** Normotensive AHF prevalence according to Hemodynamic cardiac stress as quantified by BNP plasma concentrations

|                         | <b>BNP low*</b> | <b>BNP high</b> | <b>p-value</b> |
|-------------------------|-----------------|-----------------|----------------|
| Normotensive AHF, n (%) | 295 (51)        | 371 (65)        | < 0.001        |

**Table 3S B** Normotensive AHF prevalence according to Hemodynamic cardiac stress as quantified by BNP plasma concentrations

|                         | <b>NT-proBNP low*</b> | <b>NT-proBNP high</b> | <b>p-value</b> |
|-------------------------|-----------------------|-----------------------|----------------|
| Normotensive AHF, n (%) | 276 (50)              | 364 (66)              | < 0.001        |

**Table 3S C** Normotensive AHF prevalence according to cardiomyocyte injury as quantified by hs-cTnT plasma concentrations

|                         | <b>hs-cTnT low**</b> | <b>hs-cTnT high</b> | <b>p-value</b> |
|-------------------------|----------------------|---------------------|----------------|
| Normotensive AHF, n (%) | 47 (48)              | 620 (59)            | < 0.001        |

**Table 3S D** Normotensive AHF prevalence according to cardiomyocyte injury as quantified by hs-cTnT plasma concentrations

|                         | <b>hs-cTnT low*</b> | <b>hs-cTnT high</b> | <b>p-value</b> |
|-------------------------|---------------------|---------------------|----------------|
| Normotensive AHF, n (%) | 307 (53)            | 360 (63)            | < 0.001        |

\* Below the median

\*\* Below the upper limit of normal

BNP = B-type natriuretic peptide; hs-cTnT = high-sensitivity cardiac Troponin T

**Table 4S A** Medication regardless of LVEF

|                                       | Overall  | Normotensive AHF | Hypertensive AHF | <i>p</i> -value |
|---------------------------------------|----------|------------------|------------------|-----------------|
| <b>Medication at admission, n (%)</b> |          |                  |                  |                 |
| ACE inhibitors                        | 489 (43) | 308 (47)         | 181 (38)         | 0.003           |
| ARB                                   | 290 (26) | 162 (25)         | 128 (27)         | 0.390           |
| Beta blockers                         | 730 (64) | 444 (67)         | 286 (60)         | 0.011           |
| MRB                                   | 149 (13) | 109 (16)         | 40 (8.3)         | < 0.001         |
| <b>Medication at discharge, n (%)</b> |          |                  |                  |                 |
| ACE inhibitors                        | 653 (60) | 373 (60)         | 280 (59)         | 0.913           |
| ARB                                   | 285 (26) | 159 (25)         | 126 (27)         | 0.570           |
| Beta blockers                         | 846 (77) | 485 (77)         | 361 (77)         | 0.735           |
| MRB                                   | 301 (29) | 194 (32)         | 107 (24)         | 0.002           |

**Table 4S B** Medication of patients with HFrEF

|                                       | Overall  | Normotensive AHF | Hypertensive AHF | <i>p</i> -value |
|---------------------------------------|----------|------------------|------------------|-----------------|
| <b>Medication at admission, n (%)</b> |          |                  |                  |                 |
| ACE inhibitors                        | 164 (47) | 130 (51)         | 34 (35)          | 0.009           |
| ARB                                   | 88 (25)  | 70 (28)          | 18 (19)          | 0.120           |
| Beta blockers                         | 228 (64) | 180 (70)         | 48 (50)          | < 0.001         |
| MRB                                   | 72 (20)  | 61 (24)          | 11 (11)          | 0.010           |
| <b>Medication at discharge, n (%)</b> |          |                  |                  |                 |
| ACE inhibitors                        | 233 (69) | 159 (66)         | 74 (77)          | 0.041           |
| ARB                                   | 86 (26)  | 68 (28)          | 18 (19)          | 0.083           |
| Beta blockers                         | 282 (83) | 199 (82)         | 83 (87)          | 0.311           |
| MRB                                   | 155 (49) | 110 (49)         | 45 (49)          | 0.941           |

**Table 4S C** Medication of patients with HFmrEF

|                                       | Overall  | Normotensive AHF | Hypertensive AHF | <i>p</i> -value |
|---------------------------------------|----------|------------------|------------------|-----------------|
| <b>Medication at admission, n (%)</b> |          |                  |                  |                 |
| ACE inhibitors                        | 69 (46)  | 38 (48)          | 31 (43)          | 0.534           |
| ARB                                   | 40 (27)  | 22 (28)          | 18 (25)          | 0.622           |
| Beta blockers                         | 96 (63)  | 50 (63)          | 46 (63)          | 0.972           |
| MRB                                   | 22 (15)  | 17 (22)          | 5 (7)            | 0.010           |
| <b>Medication at discharge, n (%)</b> |          |                  |                  |                 |
| ACE inhibitors                        | 92 (62)  | 48 (62)          | 44 (62)          | 0.957           |
| ARB                                   | 39 (26)  | 22 (28)          | 17 (24)          | 0.522           |
| Beta blockers                         | 119 (79) | 61 (78)          | 58 (81)          | 0.722           |
| MRB                                   | 44 (30)  | 27 (37)          | 17 (24)          | 0.101           |

**Table 4S D Medication of patients with HFpEF**

|                                       | <b>Overall</b> | <b>Normotensive AHF</b> | <b>Hypertensive AHF</b> | <b>p-value</b> |
|---------------------------------------|----------------|-------------------------|-------------------------|----------------|
| <b>Medication at admission, n (%)</b> |                |                         |                         |                |
| ACE inhibitors                        | 131 (37)       | 71 (36)                 | 60 (37)                 | 0.917          |
| ARB                                   | 97 (27)        | 36 (21)                 | 61 (32)                 | 0.021          |
| Beta blockers                         | 220 (61)       | 104 (61)                | 116 (61)                | 0.981          |
| MRB                                   | 17 (4.7)       | 6 (3.5)                 | 11 (5.7)                | 0.323          |
| <b>Medication at discharge, n (%)</b> |                |                         |                         |                |
| ACE inhibitors                        | 185 (52)       | 86 (52)                 | 99 (53)                 | 0.920          |
| ARB                                   | 99 (28)        | 37 (22)                 | 62 (33)                 | 0.021          |
| Beta blockers                         | 259 (73)       | 124 (75)                | 135 (72)                | 0.540          |
| MRB                                   | 56 (16)        | 26 (16)                 | 30 (16)                 | 0.907          |

ACE inhibitor = angiotensin-converting enzyme inhibitor; ARB = angiotensin-receptor blocker; HFrEF = heart failure with reduced ejection fraction; HFmrEF = heart failure with mid-range ejection fraction; HFpEF = heart failure with preserved ejection fraction; MRB = mineralocorticoid receptor blockers; SBP = systolic blood pressure.

**Table 5S** Hemodynamic cardiac stress and cardiomyocyte injury as quantified by NT-proBNP and cTnT/cTnI plasma concentrations in the validation cohort

|                                  | <b>Overall</b>      | <b>Normotensive AHF</b> | <b>Hypertensive AHF</b> | <b>p-value</b> |
|----------------------------------|---------------------|-------------------------|-------------------------|----------------|
| NT-proBNP in pg/mL, median (IQR) | 5,627 (2,605-11373) | 7,225 (3,183-14,532)    | 4,833 (225-8,325)       | < 0.001        |
| cTnT in ng/L, median (IQR)       | 10 (10-70)          | 10 (10-90)              | 10 (10-60)              | 0.009          |
| cTnI in ng/mL, median (IQR)      | 43 (14-217)         | 48 (19-294)             | 42 (12-179)             | 0.085          |

cTnI = cardiac Troponin I; cTnT= cardiac Troponin T; NT-proBNP = N-terminal pro-B-type natriuretic peptide; SBP = Systolic blood pressure

## Supplemental figures

**Figure 1S.** Patient flow

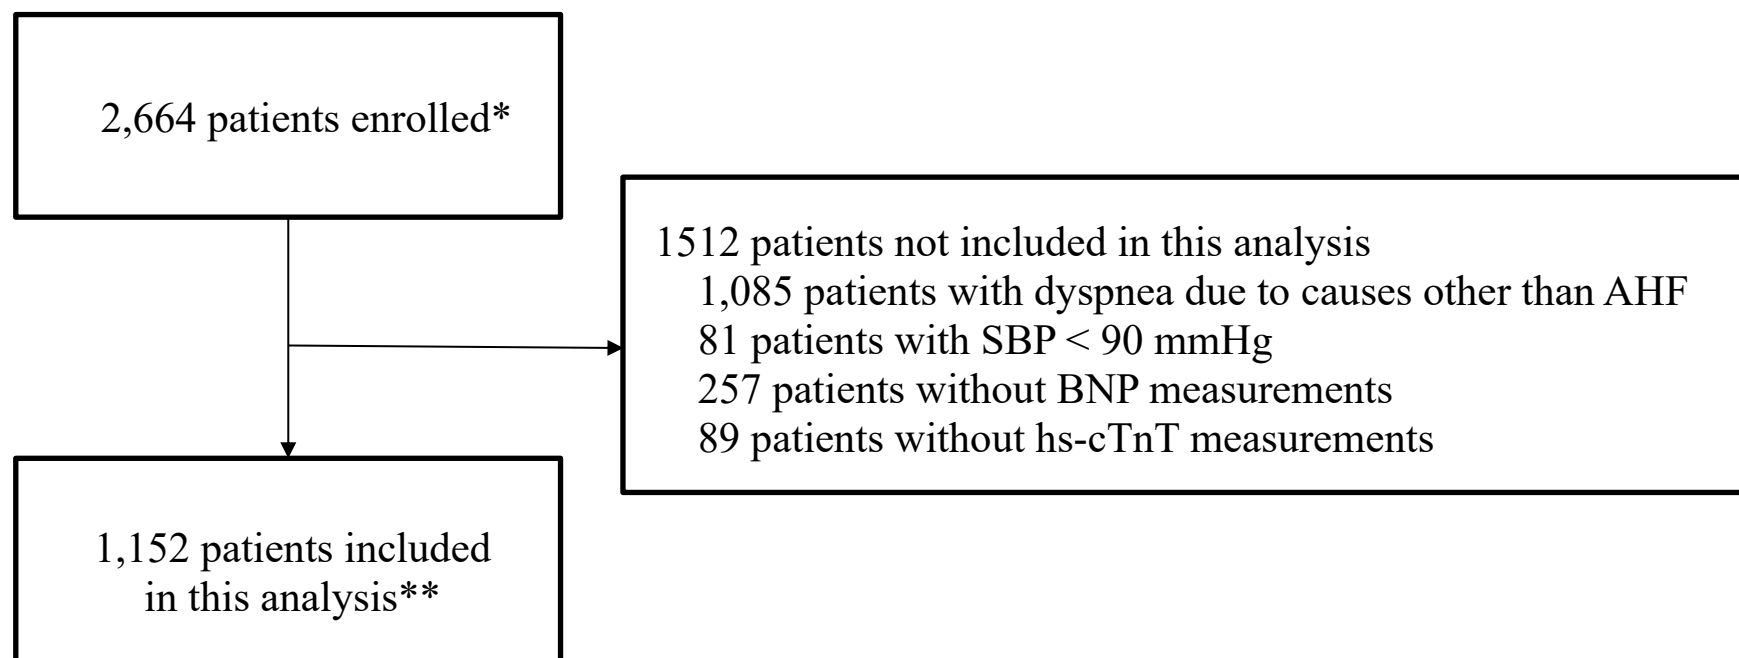

\*Including 511 patients with a final diagnosis of AHF enrolled in an AHF therapy study until 2015 (ClinicalTrials.gov registry, Number NCT00512759).

\*\*Including 309 patients with a final diagnosis of AHF enrolled in an AHF therapy study until August 2015 (ClinicalTrials.gov registry, Number NCT00512759).

AHF = acute heart failure; hs-cTnT = high-sensitivity cardiac Troponin T; BNP = B-type natriuretic peptide; SBP = systolic blood pressure
